# Supplementary material for: Surface kinematics of periglacial sorted circles using structure-from-motion technology
Source: Copernicus journal article supplement (doi:10.5194/tc-8-1041-2014), 2014-06-11
Supplement: Supplementary file 1 [file tc-8-1041-2014-supplement.zip]

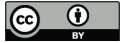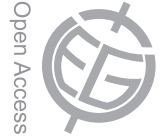

## *Supplement of*

# **Surface kinematics of periglacial sorted circles using structure-from-motion technology**

**A. Kääb et al.**

*Correspondence to:* A. Kääb (kaeaeb@geo.uio.no)

- Supplement-Cover-Letter.pdf
- detail\_northern\_circle.gif
- middle\_circle.gif
- northern\_circle.gif
